# Supplementary material for: Impact of Three Entomopathogenic Fungal Isolates on the Growth of Tomato Plants—Ectoapplication to Explore Their Effect on Tetranychus urticae
Source: MDPI journal article supplement (doi:10.3390/agronomy14040665), 2024-03-25
Supplement: s1 [file s1]

**Table S1.** ANOVA parameters for main effects and associated interactions for colonization of *Beauveria bassiana* and *Metarhizium robertsii* isolates with three inoculation methods in tomato plants (Total DF = 971).

| Source                                                   | DF | F      | p     |
|----------------------------------------------------------|----|--------|-------|
| EPF <sup>a</sup> isolate <sup>b</sup>                    | 2  | 1182.8 | <0.01 |
| Inoculation method <sup>c</sup>                          | 2  | 1249.3 | <0.01 |
| Plant part <sup>d</sup>                                  | 2  | 332.8  | <0.01 |
| Interval <sup>e</sup>                                    | 3  | 1677.1 | <0.01 |
| EPF isolate × inoculation method                         | 4  | 40.4   | <0.01 |
| EPF isolate × plant part                                 | 4  | 16.3   | <0.01 |
| EPF isolate × interval                                   | 6  | 4.9    | <0.01 |
| Inoculation method × plant part                          | 4  | 415.1  | <0.01 |
| Inoculation method × interval                            | 6  | 49.9   | <0.01 |
| Plant part × interval                                    | 6  | 12.0   | <0.01 |
| EPF isolate × inoculation method × plant part            | 8  | 8.9    | <0.01 |
| EPF isolate × inoculation method × interval              | 12 | 4.2    | <0.01 |
| EPF isolate × plant part × interval                      | 12 | 1.23   | 0.25  |
| EPF isolate × inoculation method × plant part × interval | 12 | 10.85  | <0.01 |
| EPF isolate × inoculation method × plant part × interval | 24 | 0.94   | 0.54  |

<sup>a</sup> Entomopathogenic fungal

<sup>b</sup> WG-12, WG-19, WG-02

<sup>c</sup> Foliar, root-dipping, seed-soaking

<sup>d</sup> Leaf, stem, root

<sup>e</sup> 7, 14, 21, 28 days

**Table S2.** ANOVA parameters for main effects and associated interaction for plant growth (Total DF = 109).

| Source                  | EPF isolate <sup>a</sup> |          |          | Inoculation methods <sup>b</sup> |          |          | EPF isolate × inoculation method |          |          |
|-------------------------|--------------------------|----------|----------|----------------------------------|----------|----------|----------------------------------|----------|----------|
|                         | DF                       | <i>F</i> | <i>p</i> | DF                               | <i>F</i> | <i>p</i> | DF                               | <i>F</i> | <i>p</i> |
| Plant growth parameters |                          |          |          |                                  |          |          |                                  |          |          |
| Plant height            | 2                        | 337.2    | <0.01    | 2                                | 220.9    | <0.01    | 6                                | 17.5     | <0.01    |
| Stem diameter           | 2                        | 18.6     | <0.01    | 2                                | 5.6      | <0.01    | 6                                | 7.6      | <0.01    |
| Root length             | 2                        | 269.9    | <0.01    | 2                                | 64.5     | <0.01    | 6                                | 16.4     | <0.01    |
| Root dry weight         | 2                        | 1846.3   | <0.01    | 2                                | 285.6    | <0.01    | 6                                | 24.9     | <0.01    |
| Above ground biomass    | 2                        | 2156.7   | <0.01    | 2                                | 372.8    | <0.01    | 6                                | 75.7     | <0.01    |
| Number of leaves        | 2                        | 281.0    | <0.01    | 2                                | 319.7    | <0.01    | 6                                | 30.1     | <0.01    |

<sup>a</sup> WG-12, WG-19, WG-02

<sup>b</sup> Foliar, root-dipping, seed-soaking
